# Supplementary material for: Dual-template approach to hierarchically porous polymer membranes
Source: Royal Society of Chemistry journal article supplement (doi:10.1039/d0qm00610f), 2020-11-05
Supplement: d0qm00610f1.pdf [file d0qm00610f1.pdf]

## Electronic Supporting Information

# Dual-Template Approach to Hierarchically Porous Polymer Membranes

*Thomas Southern<sup>a</sup> and Rachel C. Evans<sup>a\*</sup>*

<sup>a</sup> Department of Materials Science & Metallurgy, University of Cambridge, 27 Charles  
Babbage Road, CB3 0FS, U.K.

\* Corresponding Author: [rce26@cam.ac.uk](mailto:rce26@cam.ac.uk)

## TABLE OF CONTENTS

|   |                                                  |   |
|---|--------------------------------------------------|---|
| 1 | PORE SIZE DISTRIBUTION OF SAMPLE MEMBRANES ..... | 2 |
|---|--------------------------------------------------|---|

## 1 Pore size distribution of sample membranes

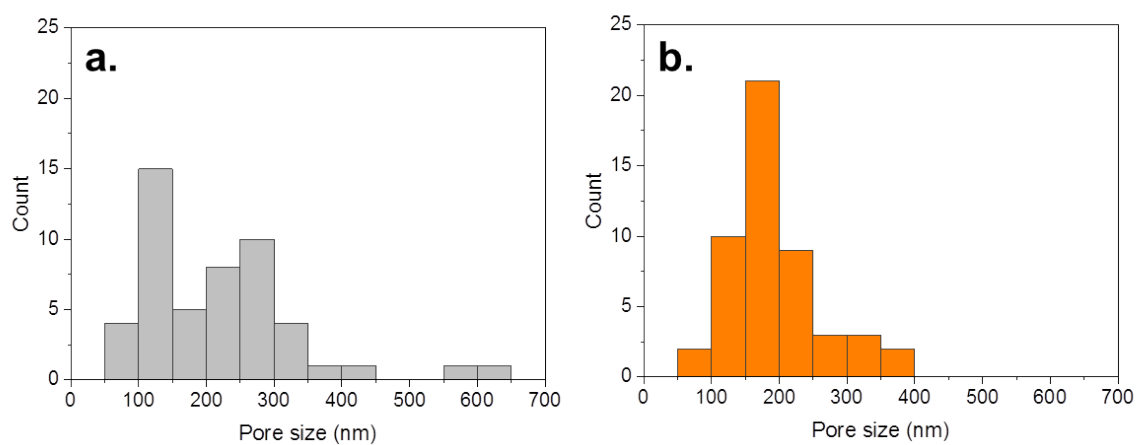

**Figure S1** Histograms showing the pore size distribution in the skin layer of (a) the control membrane and (b) test membrane containing PABA as measured by scanning electron microscopy (SEM). The mean pore sizes are determined to be  $220 \pm 116$  nm and  $188 \pm 71$  nm, respectively.
